# Supplementary material
Source: PubMed Central journal article supplement (PMC4165469)
Supplement: sb4001596_si_001.pdf [file sb4001596_si_001.pdf]

## **Materials and Methods**

### **A Biological 2-Input Decoder Circuit in Human Cells**

Michael Guinn<sup>1,3</sup> and Leonidas Bleris<sup>1,2,3,\*</sup>

<sup>1</sup>Bioengineering Department, The University of Texas at Dallas, 800 West Campbell Road, Richardson TX 75080 USA

<sup>2</sup>Electrical Engineering Department, The University of Texas at Dallas, 800 West Campbell Road, Richardson TX 75080 USA

<sup>3</sup>Center for Systems Biology, The University of Texas at Dallas, NSERL 4.708, 800 West Campbell Road, Richardson TX 75080 USA

\*Corresponding author

Email: [bleris@utdallas.edu](mailto:bleris@utdallas.edu)

Phone: 972-883-5785

## Supplementary Figures

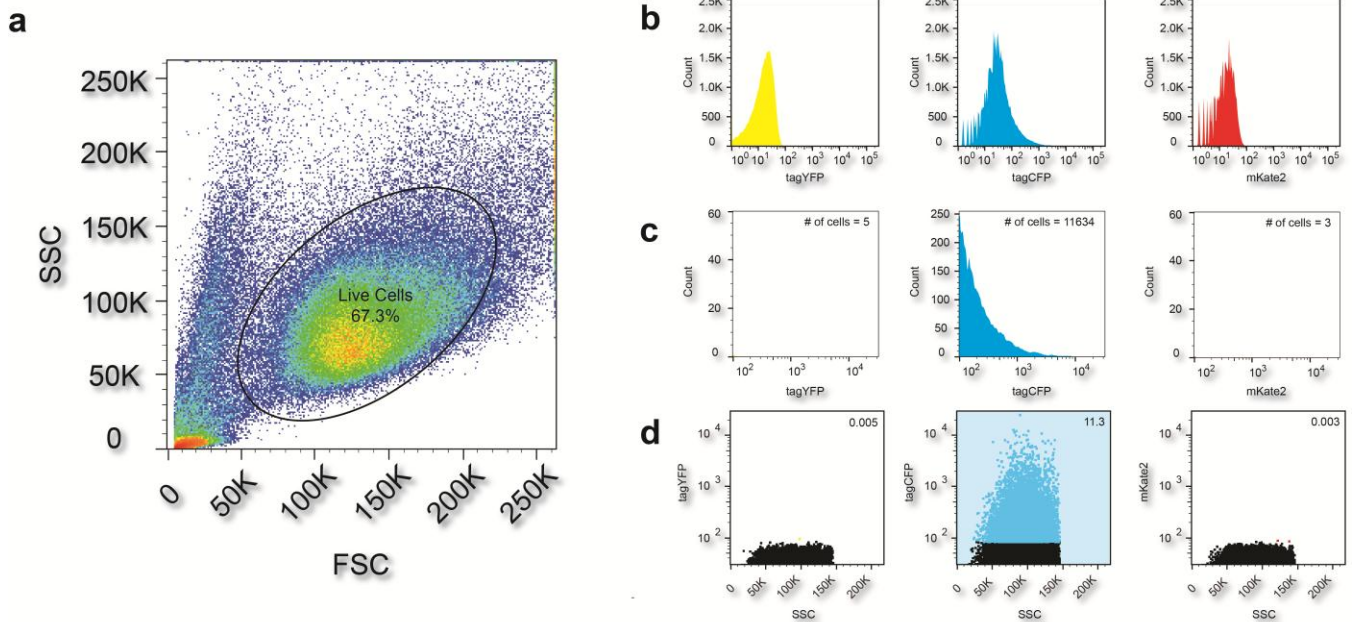

**Supplement Figure 1. Gating for case ‘10’ of the decoder.** (a) Side scatter versus forward scatter gating used to select single cell events. The gate is shown as the ellipse on the scatter plot. A single gate was created based on an individual sample and kept constant between all samples of a particular experiment. (b) Histograms of the gated single cells from panel a. These histograms are the raw fluorescence intensities of tagYFP, tagCFP, and mKate. (c) Histograms for cells above the background fluorescence gate (set at 10<sup>2</sup> au). In the upper-right hand corner of each histogram is the number of cells for each color. In this case (‘10’), we observe only tagCFP signal, while tagYFP and mKate2 signals are OFF. (d) An alternative representation of the data as a scatter plot of fluorescence intensity versus side scatter. Once again, the only signal present is tagCFP, while tagYFP and mKate2 are OFF. In the upper right hand corner of each scatter plot is the frequency of cells that fall above the background auto-fluorescence gate. The background gate is shown visually on the graph, with black dots falling below this gate, while color dots (yellow, blue, and red) are cell events that fall above the threshold. The MFI of cells above the gate here as well as the frequency of cells above the gate here are used to calculate the iMFI.

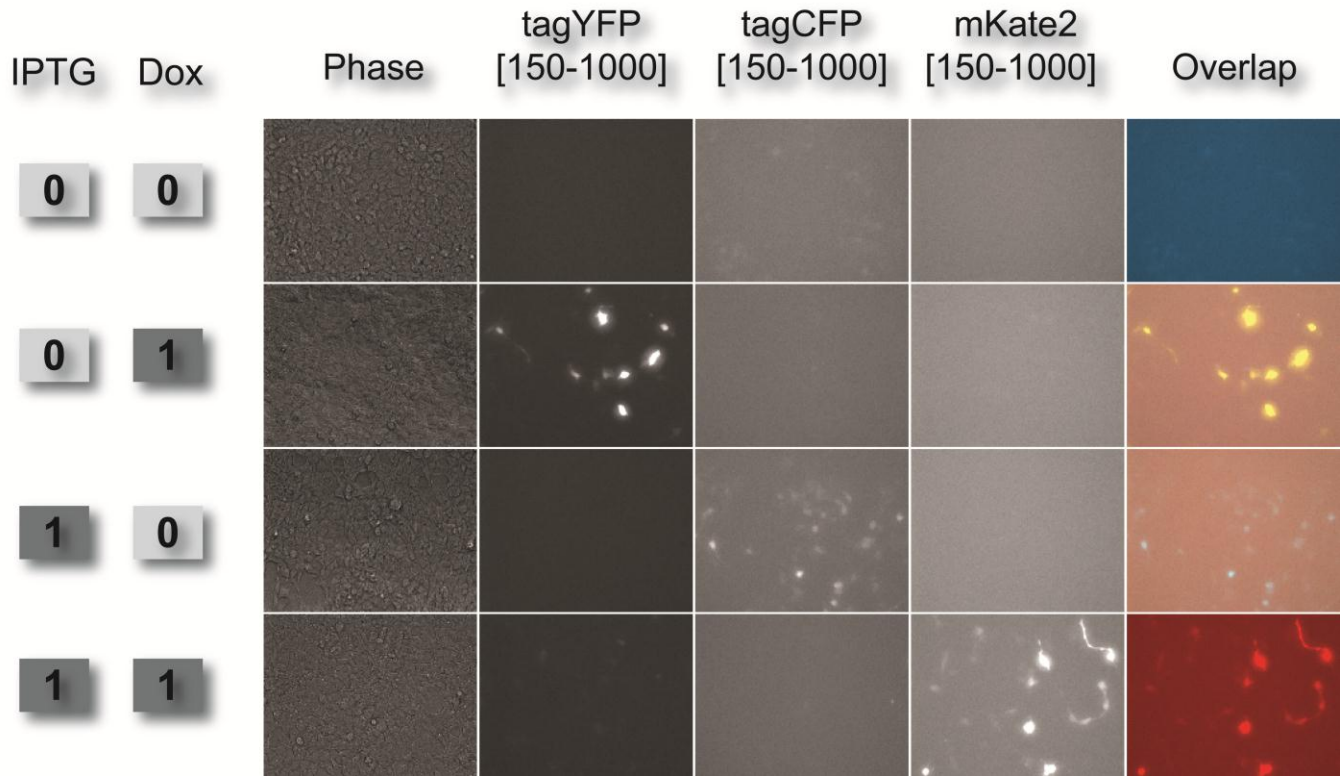

**Supplement Figure 2. Fluorescence microscopy data.** There are five columns, a bright field showing the live cells, a tagYFP, tagCFP, and mKate2 field, and finally an overlap of the three fluorescence fields. Each row is a different state of the decoder. Each field is normalized to the same intensity, so that images from the same column can be compared with each other.

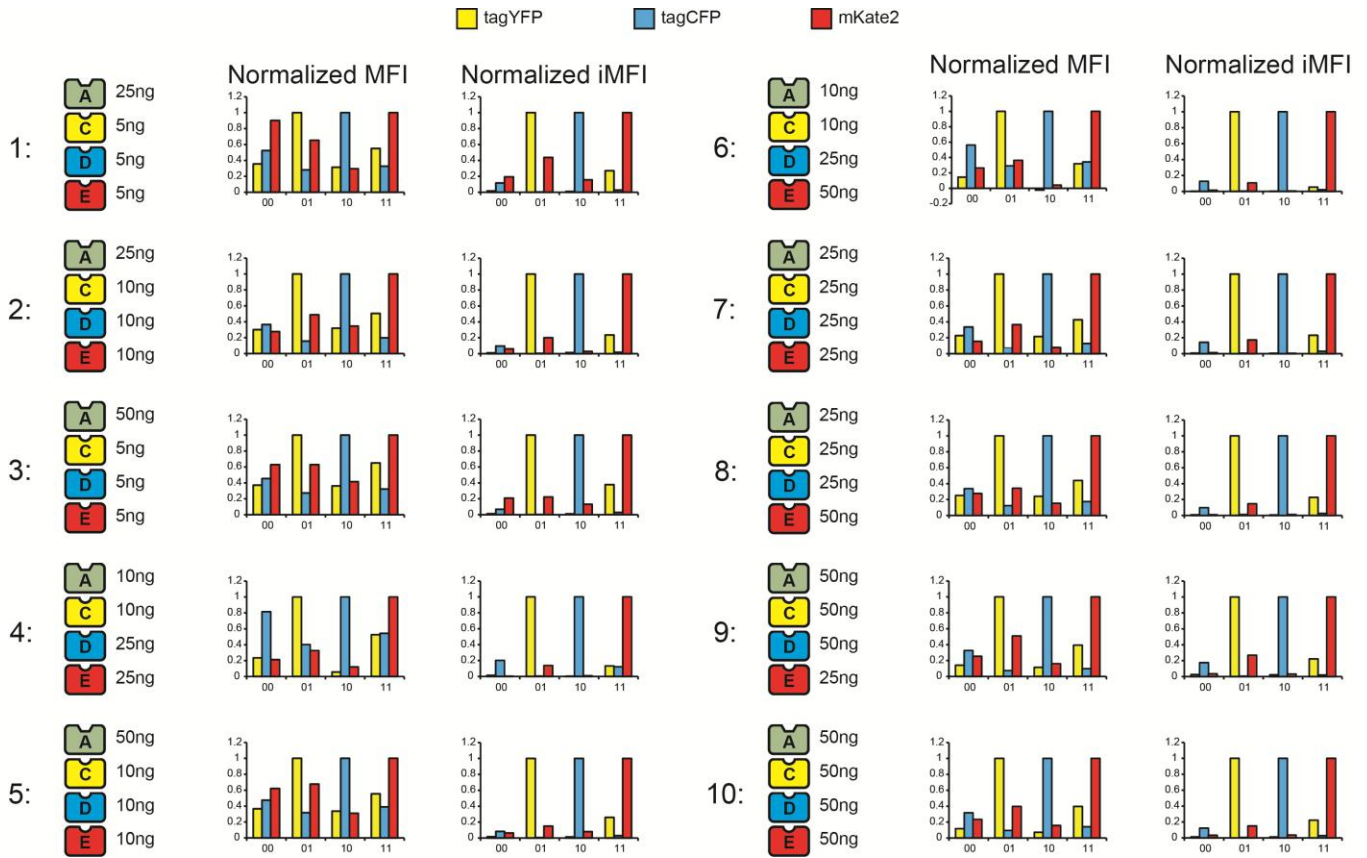

**Supplement Figure 3. Titration experiments.** Several different mass and molar ratios of circuit nodes displayed.

Each transfection state has both the normalized MFI and iMFI shown.

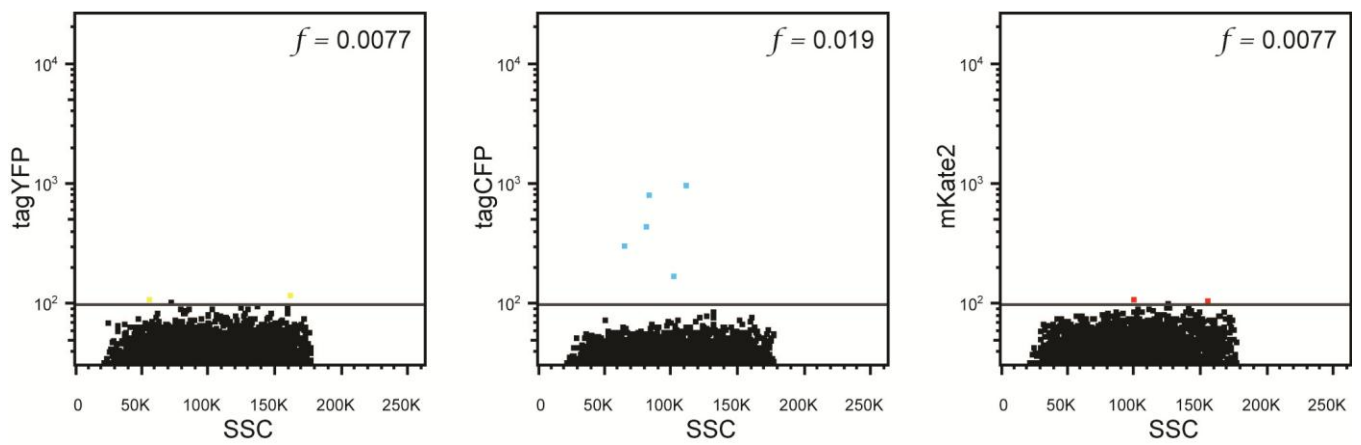

**Supplement Figure 4. Untransfected cells for setting the background gate.** A scatter plot for untransfected mammalian cells used to set a threshold for background fluorescence. The black horizontal line is the threshold and was set at 100 a.u. for all fluorescence fields.

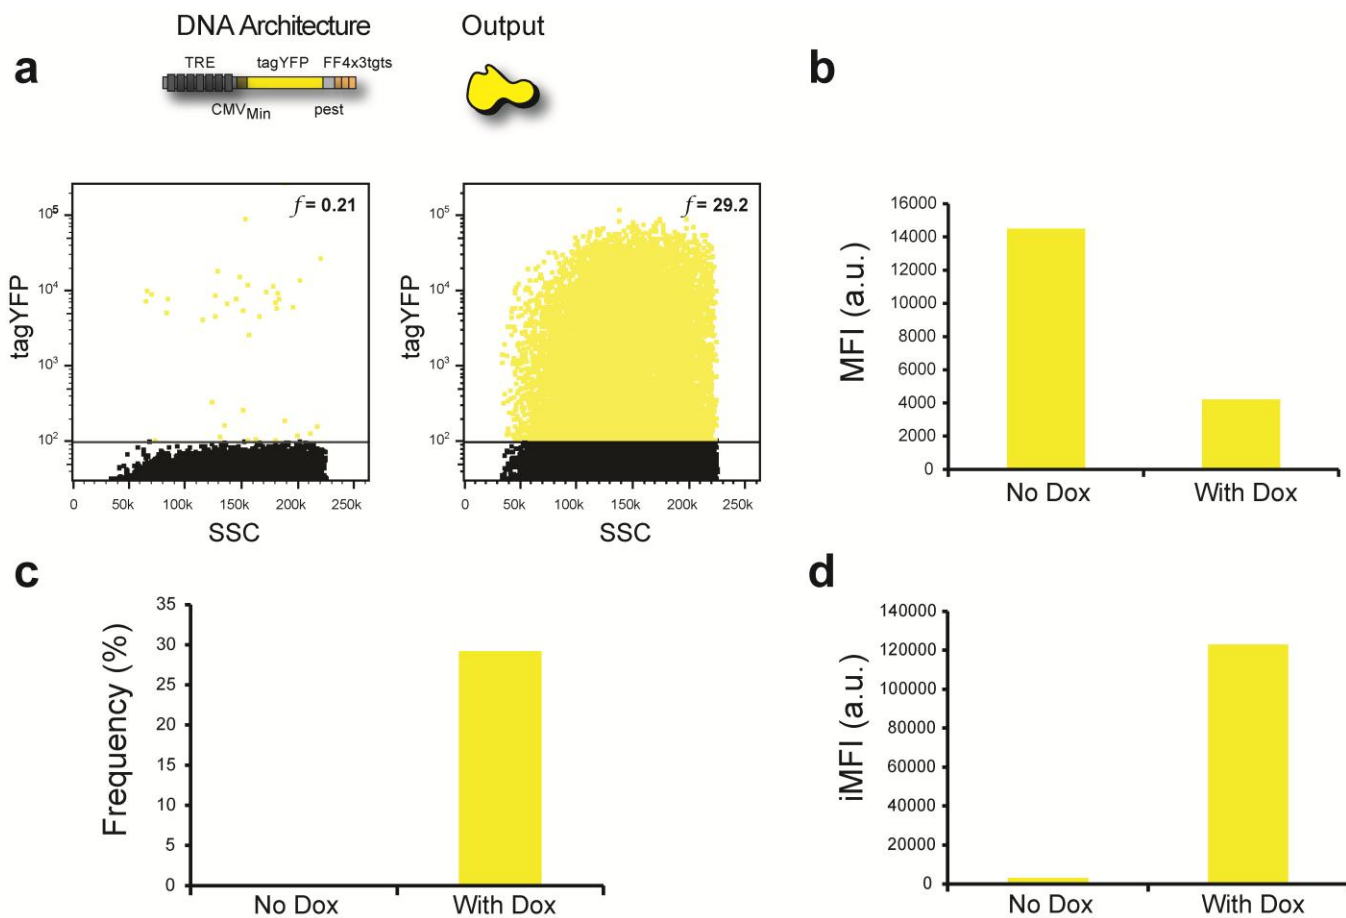

**Supplement Figure 5. Control experiment for iMFI.** (a) Flow cytometry data of tagYFP expression above background fluorescence mammalian cells transfected with node C of the decoder. There are two states: the “OFF” state with the absence of doxycycline and the “ON” state with the presence of doxycycline. (b) The mean fluorescence intensity is higher for the OFF state due to leaky cells. (c) Frequency of tagYFP expression in mammalian cells above background fluorescence. (d) Integrated mean fluorescence intensity of tagYFP expression in mammalian cells above background fluorescence.

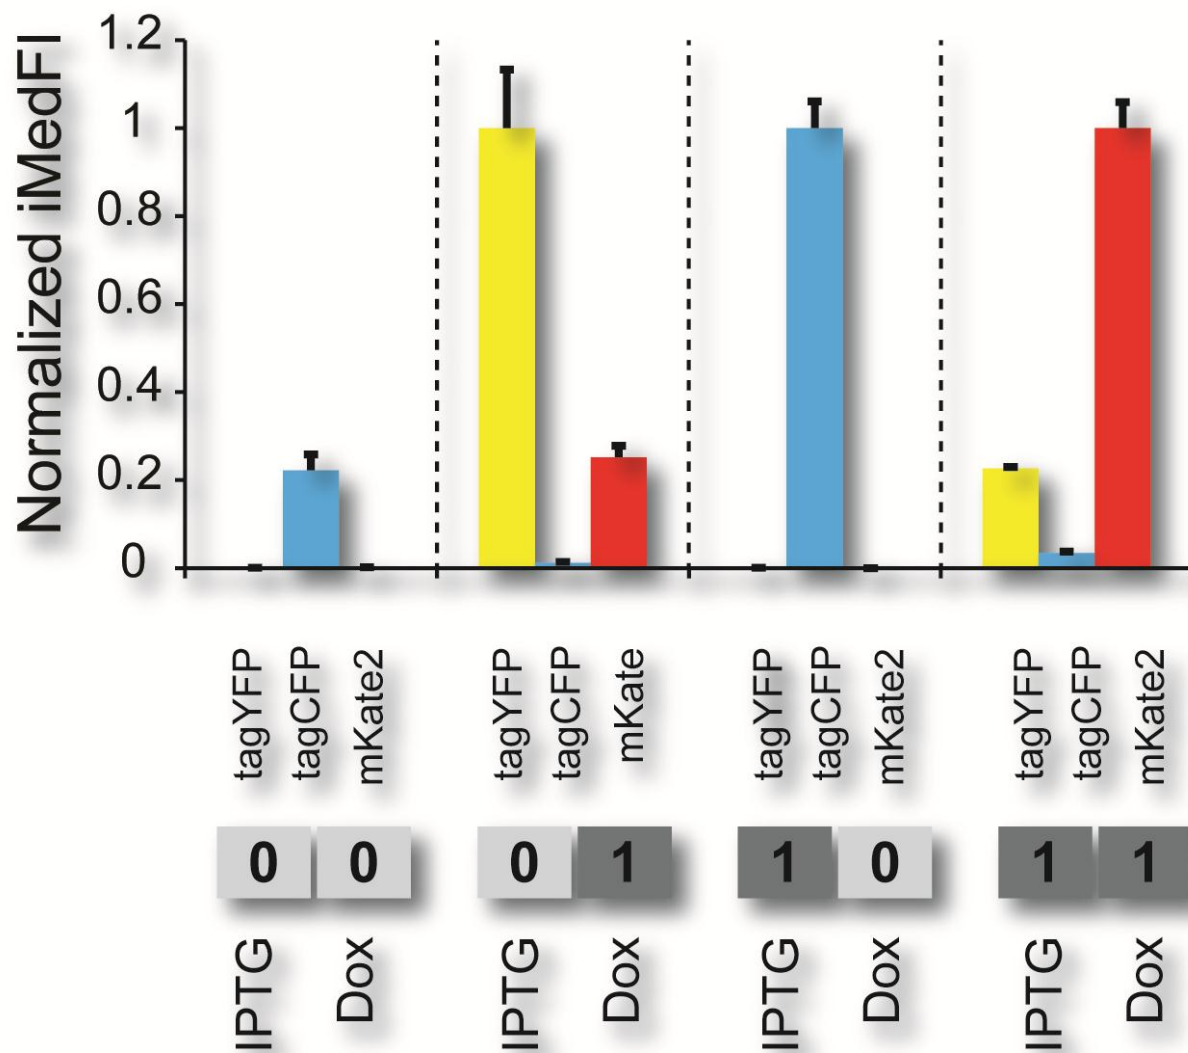

**Supplement Figure 6. Integrated median fluorescence intensity (iMedFI).** The same experiment as in Figure 3d (main text), but the integrated median fluorescence intensity was calculated instead of the integrated mean fluorescence intensity. Similar to the iMFI, the iMedFI shows at least 4-5 fold change between all ON and OFF states.

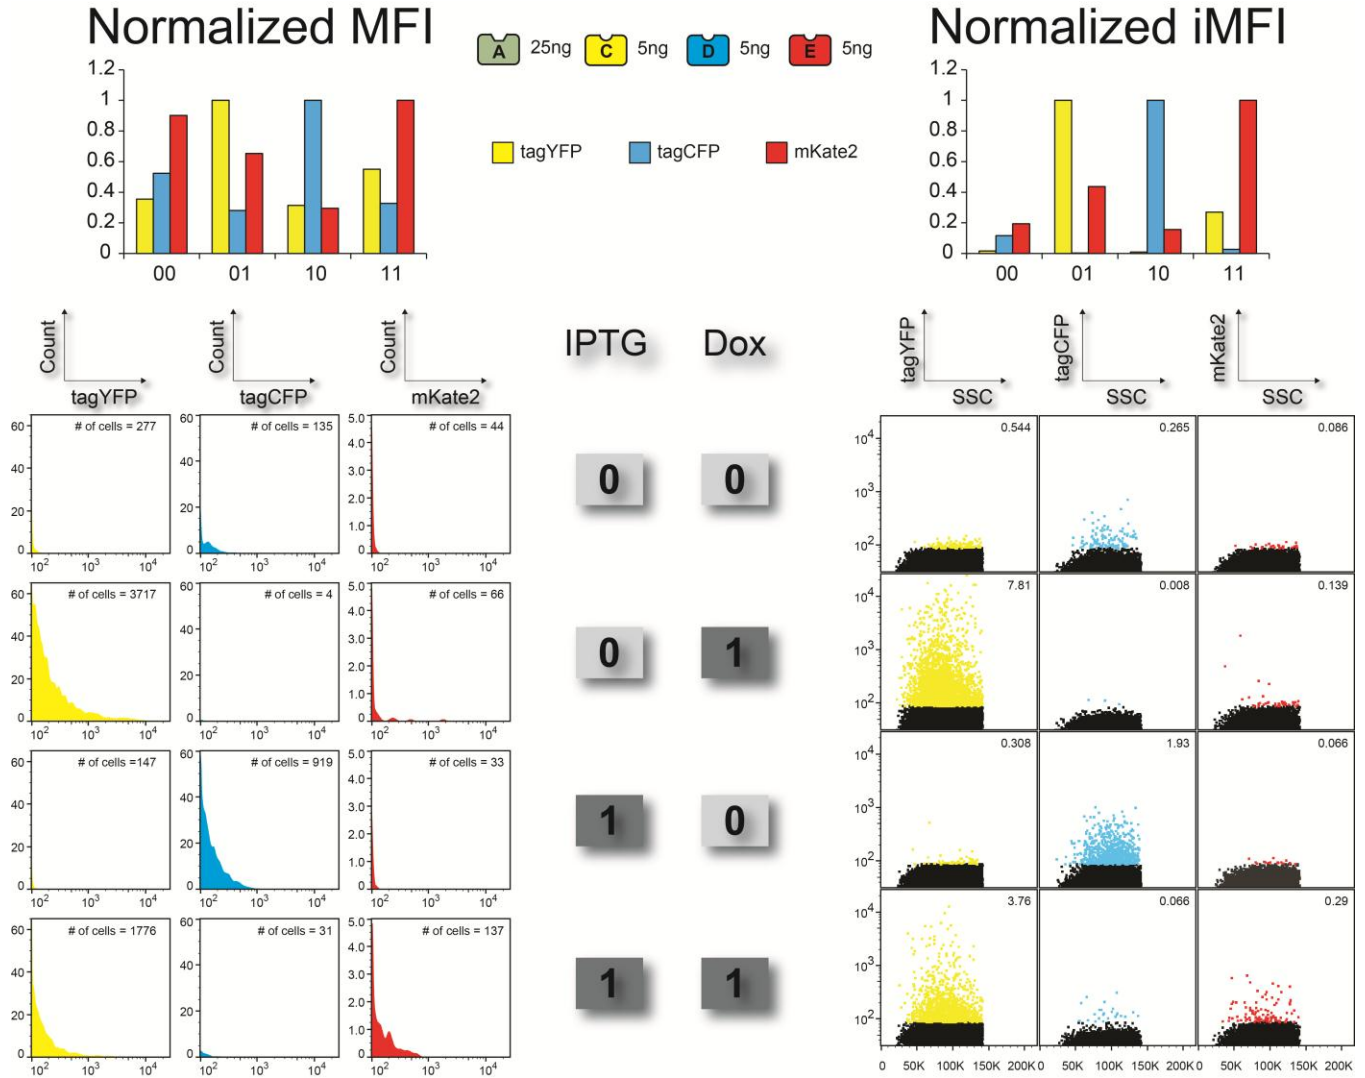

**Supplement Figure 7.** A side-by-side comparison of MFI and iMFI for condition 1 of Supplement Figure 2. On the left, the MFI and the corresponding histograms for the four states. On the right, the iMFI and the corresponding scatter plots for the four states. Each flow cytometry panel contains the number of cells or the frequency.



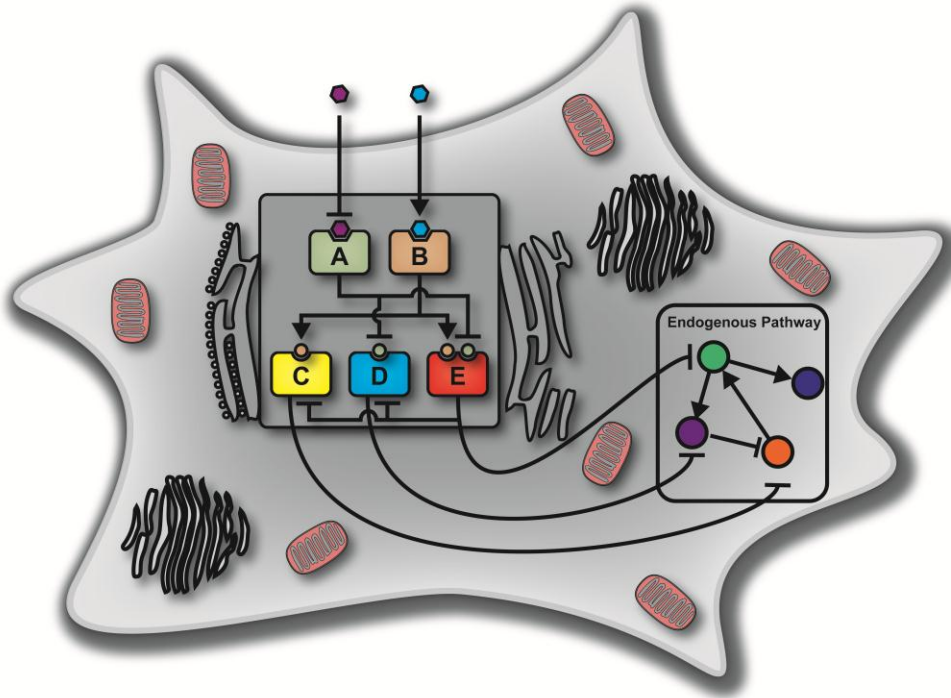

**Supplement Figure 8.** An illustration of the decoder circuit interfaced with an endogenous cellular pathway.

Depending on the state of perturbation, the decoder can interface a variety of nodes within a given pathway.

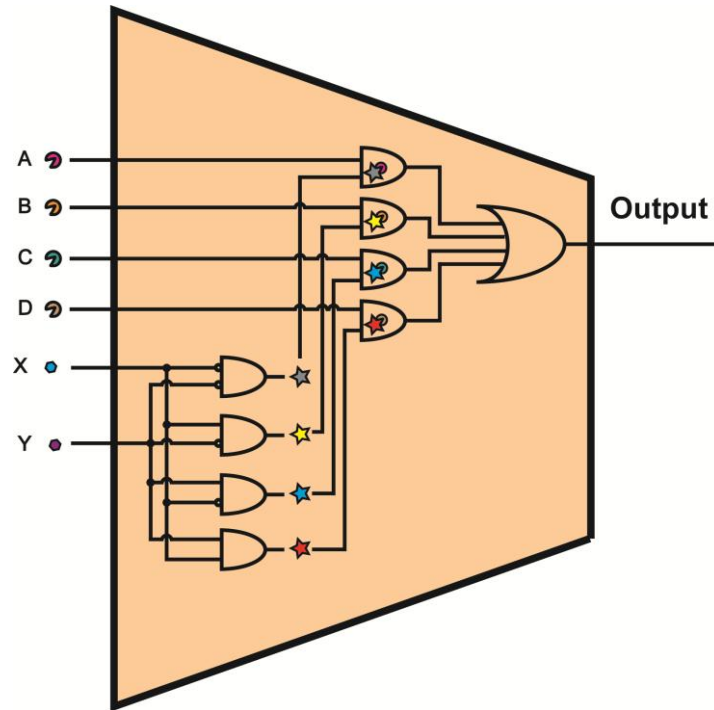

**Supplement Figure 9.** A biological multiplexer. The decoder module decodes the combination of inputs (X, Y) and depending on the response generated, a line A, B, C, or D is chosen as the output line.

## **Enzymes and reagents**

Phusion DNA polymerase (Thermo Scientific, catalog number: F-530S), Q5 High-Fidelity DNA polymerase (New England Biolabs, catalog number: M0493S), and dNTPs (New England Biolabs, catalog number N0447S) were used in various PCR amplification reactions. Endonuclease restriction enzymes and T4 DNA Ligase (catalog number: M0202S) were purchased from New England Biolabs and used in digestion and ligation reactions respectively. Calf intestinal alkaline phosphatase (New England Biolabs, catalog number: M0290S) was used for de-phosphorylation reactions. Doxycycline (Sigma-Aldrich, product number: D9891) was used in transfection of the synthetic biological circuit. Isopropyl  $\beta$ -D-1-thiogalactopyranoside (Sigma-Aldrich, product number: I6758) was used in transfection of the synthetic biological circuit.

## Recombinant DNA Constructs

**CMV\_LacI-KRAB\_FF5X3tgts\_FF6X3tgts:** A CMV\_LacI-KRAB\_FF5X3tgts\_FF6X3tgts was used as a decoder node 2<sup>1</sup>.

**UbC\_2xLacO2\_tagCFP\_FF4X3tgts:** CMV\_tagCFP was purchased from Evrogen (catalog number: FP112). The pNEBR-R1 vector was purchased from New England BioLabs (catalog number: N8079). The pEXPR-IBA15 vector was purchased from IBA GmbH-Solutions For Life Sciences (catalog number: 2-1915-000). The pCMV\_CuO\_RFP\_t2A\_copGFP vector was purchased from System Biosciences (catalog number: QM350A). The UbC sequence was cloned out of the pNEBR-R1 using NheI and AscI restriction enzyme sites and cloned into the pEXPR-IBA15 vector using NheI and MluI restriction enzyme sites. This produced the UbC vector. The CuO sequence was PCR amplified from the pCMV\_CuO\_RFP\_t2A\_copGFP vector using primers **P1** and **P2** and cloned into the UbC\_mKate2\_pest<sup>2</sup> vector using NheI and KpnI restriction enzyme sites. This produced the UbC-CuO vector (unpublished data). The Kozak\_tagCFP sequence was PCR amplified from the CMV\_tagCFP vector using primers **P3** and **P4** and cloned into the CMV\_tagYFP\_pest vector using BspEI and NheI restriction enzyme sites. This produced CMV\_tagCFP\_pest vector. The tagCFP\_pest sequence was PCR amplified from the CMV\_tagCFP\_pest vector using primers **P5** and **P6** and cloned into the UbC\_CuO vector with the KpnI restriction enzyme site. This produced the UbC\_CuO\_tagCFP\_pest vector. A 2xLacO\_tagCFP\_pest sequence was PCR amplified from the UbC\_CuO\_tagCFP\_pest vector using primers **P7** and **P8** and cloned into the UbC\_CuO\_tagCFP\_pest vector NheI and KpnI restriction enzyme sites. The primers from the previous PCR (**P7** and **P8**) contained an overhang with two consecutive lac operator sequences upstream to the sequence that bound the UbC\_CuO\_tagCFP\_pest vector. This produced the UbC\_2xLacO\_tagCFP\_pest vector. Primers **P9** and **P10** were annealed together and cloned into the UbC\_2xLacO\_tagCFP\_pest vector using KpnI and BamHI restriction enzyme sites. This produced the UbC\_2xLacO\_tagCFP\_pest\_FF4X3tgts vector. The UbC\_2xLacO-tagCFP sequence was PCR amplified from the UbC\_2xLacO\_tagCFP\_pest\_FF4X3tgts vector using the primers **P11** and **P12** and cloned into a EF1 $\alpha$ \_FF3X3tgts\_FF4X3tgts vector using ClaI and KpnI restriction enzymes. This produced the UbC\_2xLacO\_tagCFP\_FF3X3tgts\_FF4X3tgts vector.

**TRE\_CMV<sub>min</sub>\_2xLacO\_mKate2\_pest\_miR-FF4:** The pTRE3G vector was purchased from Clontech (catalog number: 631332). The pmKate2-C vector was purchased from Evrogen (catalog number: FP181). The pmKate2-C vector was first transformed into dam<sup>-</sup>/dcm<sup>-</sup> competent *E. coli* (New England Biolabs, catalog number: C2925) to free the XbaI restriction site. The pest sequence was PCR amplified from Switchgear Genomics luciferase reporter system for SPERPINE1 (catalog number: S721729) using primers **P13** and **P14** and cloned into the pmKate2-C vector using the BspEI and XbaI restriction enzyme sites. This produced CMV\_mKate2\_pest. A miR-FF4 sequence was PCR amplified from the p234-PCMV-Neo-FF4<sup>3</sup> vector using primers **P15** and **P16** and cloned into the CMV\_mKate2\_pest vector using ClaI and EcoRI restriction enzyme sites. This produced CMV\_mKate2\_pest\_miR-FF4 vector. The mKate2\_pest\_miR-FF4 sequence was PCR amplified from the CMV\_mKate2\_pest\_miR-FF4 with Primers **P17** and **P18** and cloned into the pTRE3G vector using BamHI and EcoRV restriction enzymes sites. This produced TRE\_CMV<sub>min</sub>\_mKate2\_pest\_miR-FF4. Primers **P19** and **P20** were annealed together and cloned into the TRE\_CMV<sub>min</sub>\_mKate2\_pest\_FF4 vector using BglIII and BamHI restriction enzyme sites. This produced the TRE\_CMV<sub>min</sub>\_2xLacO\_mKate\_pest\_FF4 vector.

**TRE\_CMV<sub>min</sub>\_YFP\_pest\_FF3X1tgts\_FF4X3tgts:** The Tet-On-3G System Bidirectional vector (pTRE3G) was purchased from Clontech (catalog number 631332). pCMV\_YFP-C was purchased from Evrogen (catalog number: FP131). The pest sequence was PCR amplified from Switchgear Genomics luciferase reporter system for SPERPINE1 (catalog number: S721729) using primers **P21** and **P22** and cloned into pCMV\_YFP-C vector using BglIII and SalI restriction enzyme sites. This generated the pCMV\_tagYFP\_pest vector. The pCMV\_tagYFP\_PEST was PCR amplified from above plasmid using primers **P23** and **P24** and cloned into EF1 $\alpha$ \_FF3X3tgts\_FF4X3tgts vector using ClaI restriction enzyme sites. This generated CMV\_tagYFP\_pest\_FF3x3tgts\_FF4x3tgts vector. The tagYFP\_pest\_FF3X3tgts\_FF4X3tgts sequence was PCR amplified from CMV\_tagYFP\_pest\_FF3X1tgts-FF4X3tgts vector using the primers **P25** and **P26** and cloned into the pTRE3G vector using EcoRI and KpnI restriction enzyme sites. This produced the TRE\_CMV<sub>min</sub>\_YFP\_pest\_FF3X1tgt\_FF4X3tgts vector.

## Primers List

| Primer ID | Sequence                                                                                                  | Function                               |
|-----------|-----------------------------------------------------------------------------------------------------------|----------------------------------------|
| P1        | CAGTACGCTAGCCGCAAATGGGCAAGCTTGCC                                                                          | Forward primer for cumate operator     |
| P2        | CAGTACGGTACCACCAAACCTTGGACCTGGGAG                                                                         | Reverse primer for cumate operator     |
| P3        | CAGTACGCTAGCACCCGGTCGCCACCATGAGCGGGGG                                                                     | Forward primer for tagCFP              |
| P4        | CAGTACTCCGGAGCGGTACAGCTCGTCCATG                                                                           | Reverse primer for tagCFP              |
| P5        | CAGTACGGTACCCGCCACCATGAGCGGGGGCGAGGAG                                                                     | Forward primer for tagCFP-pest         |
| P6        | CAGTACGGTACCTTAGACGTTGATCCTGGCGCTGGCG                                                                     | Reverse primer for tagCFP pest         |
| P7        | CAGTACGCTAGCAATTGTGAGCGCTCACAATTCACAACCTAGAA<br>TTGTGAGCGCTCACAATTCACAACCTAGCGCCACCATGAGCGGG<br>GGCGAGGAG | Forward primer for 2xLacO-tagCFP-pest  |
| P8        | CAGTACGGTACCTTAGACGTTGATCCTGGCGCTGGC                                                                      | Reverse primer for 2xLacO -tagCFP-pest |
| P9        | CCCGCTTGAAGTCTTTAATTAACCGCTTGAAGTCTTTAATTAAA<br>CCGCTTGAAGTCTTTAATTAAG                                    | Forward primer for miR-FF4x3tgts       |
| P10       | GATCCTTTAATTAAGACTTCAAGCGGTTAATTAAGACTTCAA<br>GCGGTTTAAATTAAGACTTCAAGCGGGGTAC                             | Reverse primer for miR-FF4x3tgts       |
| P11       | CAGTACATCGATATACGCGCCGGCCTCCGCGCCGGGT                                                                     | Forward primer for UbC-2xLacO-tagCFP   |
| P12       | CAGTACGGTACCTTAGCGGTACAGCTCGTCCATGCCGTGG                                                                  | Reverse primer for UbC-2xLacO-tagCFP   |
| P13       | CAGTACTCCGGATCTCACGGCTTCCCTCCCGAGGTGG                                                                     | Forward primer for pest domain         |
| P14       | CAGTACTCTAGATTAGACGTTGATCCTGGCGCTGGCG                                                                     | Reverse primer for pest domain         |
| P15       | CAGTACTCTAGAGCGGCCGCAAGCCTTGTTAAGTGCT                                                                     | Forward primer for miR-FF4             |
| P16       | CAGTACTCTAGACGGTCAACCGCTCGCCGCGTGTTT                                                                      | Reverse primer for miR-FF4             |
| P17       | CAGTCGGGATCCCGCCACCATGGTGAGCGAGCTGATT                                                                     | Forward primer for mKate-pest-miR-FF4  |
| P18       | CAGTCGGATATCGCGTGTTTAAACGCATTAGTCTTCC                                                                     | Reverse primer for mKate-pest-miR-FF4  |
| P19       | GATCTAATTGTGAGCGCTCACAATTCACAACCTAGAATTGTGAG<br>CGCTCACAATTCACAACCTAGG                                    | Forward primer for 2xLacO              |
| P20       | GATCCCTAGGTTGTGGAATTGTGAGCGCTCACAATTCTAGGTTGT<br>GGAATTGTGAGCGCTCACAATTA                                  | Reverse primer for 2xLacO              |

|            |                                        |                                                    |
|------------|----------------------------------------|----------------------------------------------------|
| <b>P21</b> | CAGTACAGATCTTCTCACGGCTTCCCTCCCGAGGTGG  | Forward primer for pest domain                     |
| <b>P22</b> | CAGTACGTCGACTTAGACGTTGATCCTGGCGCTGGCG  | Reverse primer for pest domain                     |
| <b>P23</b> | CAGTACATCGATTAGTTATTAATAGTAATCAATTACG  | Forward primer for pCMV-tagYFP-pest                |
| <b>P24</b> | CAGTACATCGATGTTAAGATACATTGATGAGTTTGGAC | Reverse primer for pCMV-tagYFP-pest                |
| <b>P25</b> | CAGTACGAATTCGCCACCATGGTTAGCAAAGGCGAG   | Forward primer for tagYFP-pest-FF3x3tgts-FF4x3tgts |
| <b>P26</b> | CCAGGTACCTTATCTAGATCCGGTGGATCC         | Reverse primer for tagYFP-pest-FF3x3tgts-FF4x3tgts |

## Biological Parts

| Biological Component | Description                                                                                                                                                                                                                                                                      |
|----------------------|----------------------------------------------------------------------------------------------------------------------------------------------------------------------------------------------------------------------------------------------------------------------------------|
| CMV                  | The Cytomegalovirus immediate-early promoter which causes strong constitutive transcription of the gene downstream.                                                                                                                                                              |
| rtTA                 | The Tet-On 3G protein that binds the Tet Response Element (TRE) when bound by doxycycline and therefore activates transcription of the gene downstream of the TRE site.                                                                                                          |
| LacI-KRAB            | A DNA-binding protein fused with the Krüppel associated box (KRAB) that binds the operator sequence of the lac operon therefore preventing transcription of the gene downstream of the lac operon sequence.                                                                      |
| KRAB                 | The Krüppel associated box (KRAB) is a transcriptional repression domain.                                                                                                                                                                                                        |
| IPTG                 | Isopropyl $\beta$ -D-1-thiogalactopyranoside (IPTG) is a molecular compound that binds to the lac repressor protein (LacI), and releases the tetrameric repressor from the lac operator sequence and allowing transcription of the gene downstream of the lac operator sequence. |
| Doxycycline          | A tetracycline antibiotic that binds the Tet-On 3G protein, rtTA, causing a conformational change, allowing the complex to bind the Tet Responsive Element (TRE). These events activate transcription of the gene downstream of the TRE site.                                    |
| TRE                  | A DNA sequence that consists of 7 repeats of the 19 base pair bacterial tet-operator sequence. The synthetic site allows the binding of the protein rtTA, which drives transcription of the gene downstream of the TRE site.                                                     |
| CMV <sub>min</sub>   | A 59 nucleotide sequence of CMV promoter sequence that only drives gene transcription when the adjacent enhancer region is bound by the activating transcription factor (in this case rtTA and the Tet Response Element).                                                        |
| LacO                 | The DNA sequence known as the lac operator which is bound by the lac repressor (LacI).                                                                                                                                                                                           |
| tagYFP               | Yellow Fluorescent Protein                                                                                                                                                                                                                                                       |
| tagCFP               | Cyan Fluorescent Protein                                                                                                                                                                                                                                                         |
| mKate2               | Far-red Fluorescent Protein                                                                                                                                                                                                                                                      |
| miR-FF4              | A synthetic micro RNA produced from miR-30.                                                                                                                                                                                                                                      |
| FF4X3tgts            | Perfect complimentary microRNA targets that the synthetic microRNA miR-FF4 bind.                                                                                                                                                                                                 |



## References

1. Rinaudo, K., Bleris, L., Maddamsetti, R., Subramanian, S., Weiss, R., and Benenson, Y. (2007) A universal RNAi-based logic evaluator that operates in mammalian cells. *Nat Biotech.* 25, 795-801.
2. Li, Y., Moore, R., Guinn, M., and Bleris, L. (2012) Transcription activator-like effector hybrids for conditional control and rewiring of chromosomal transgene expression. *Sci. Rep.* 2.
3. Leisner, M., Bleris, L., Lohmueller, J., Xie, Z., and Benenson, Y. (2010) Rationally designed logic integration of regulatory signals in mammalian cells. *Nat Nano.* 5, 666-670.
